# Supplementary material for: Subventricular zone cytogenesis provides trophic support for neural repair in a mouse model of stroke
Source: PubMed Central journal article supplement (PMC10564905; doi:10.1038/s41467-023-42138-0), 2023-10-10
Supplement: 41467_2023_42138_MOESM4_ESM.pdf [file 41467_2023_42138_MOESM4_ESM.pdf]

## **Description of Additional Supplementary Files**

**Supplementary Data 1:** List of reagents.
